# Supplementary material
Source: PubMed Central journal article supplement (PMC3583298)

A

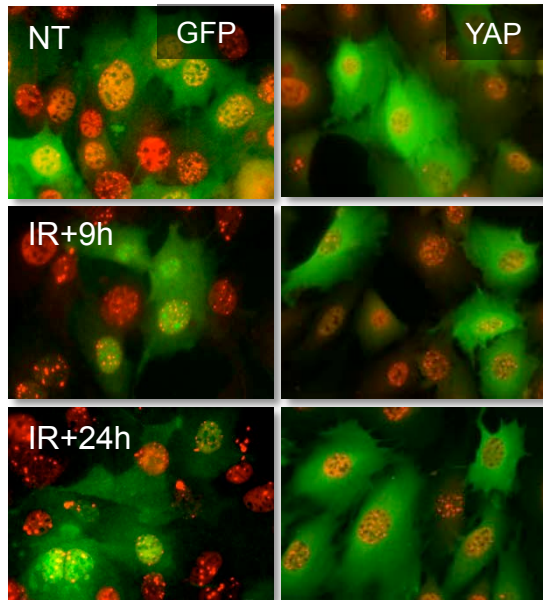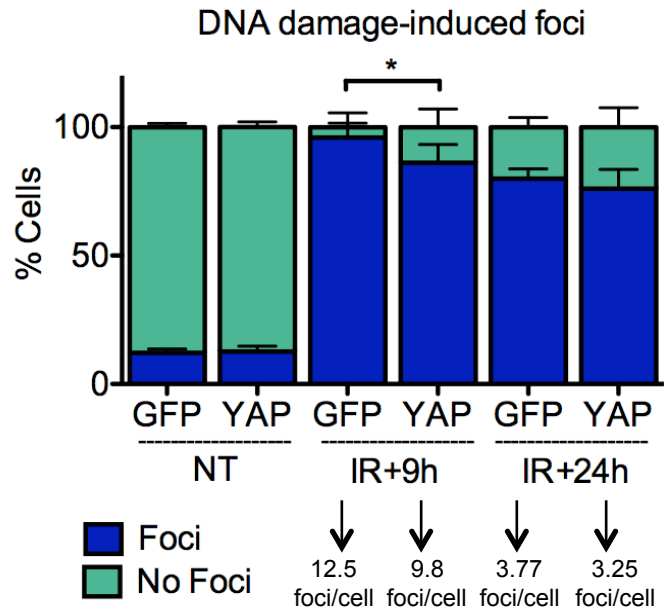

B

|           | Mean chromosome number per cell (range) | Frequency of observed chromosomal events/2n equivalent |       |           |             |                  |        |           | Total cells |
|-----------|-----------------------------------------|--------------------------------------------------------|-------|-----------|-------------|------------------|--------|-----------|-------------|
|           |                                         | Dicentrics                                             | Rings | Acentrics | Rob fusions | Radial exchanges | Breaks | Fragments |             |
| PZP53-YAP | 123.8 (99-235)                          | 2.48                                                   | 0.14  | 0.23      | 0.25        | 0.17             | 0.58   | 2.26      | 25          |
| PZP53-GFP | 123.9 (88-212)                          | 2.21                                                   | 0.08  | 0.05      | 0.1         | 0                | 0.18   | 1.3       | 25          |

C

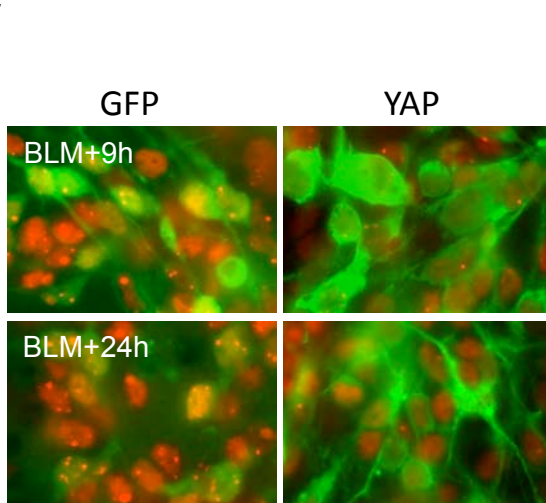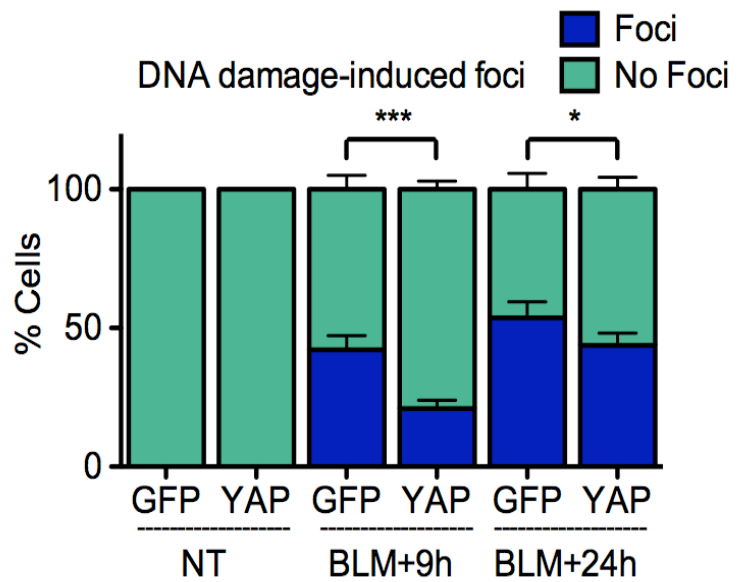

Supplement: NIHMS314384-supplement-4.pdf [file NIHMS314384-supplement-4.pdf]
