# Supplementary material
Source: PubMed Central journal article supplement (PMC3583298)

A

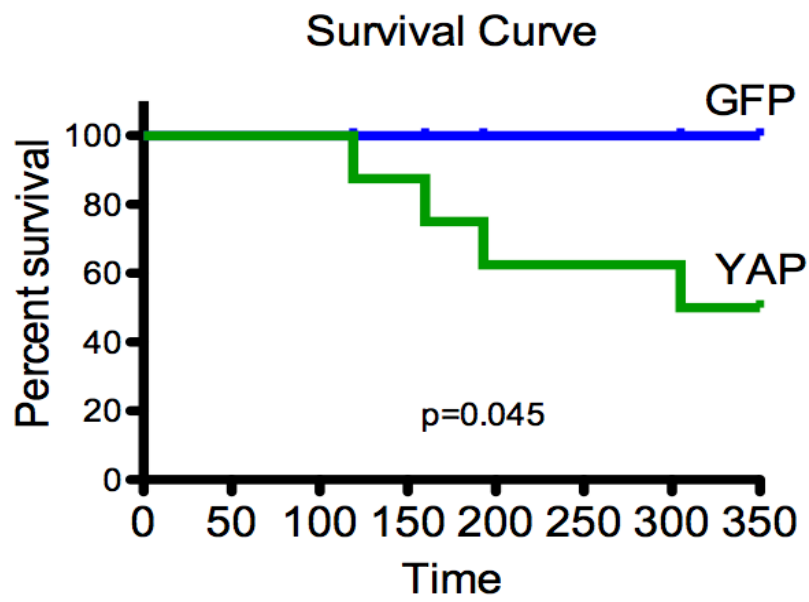

B

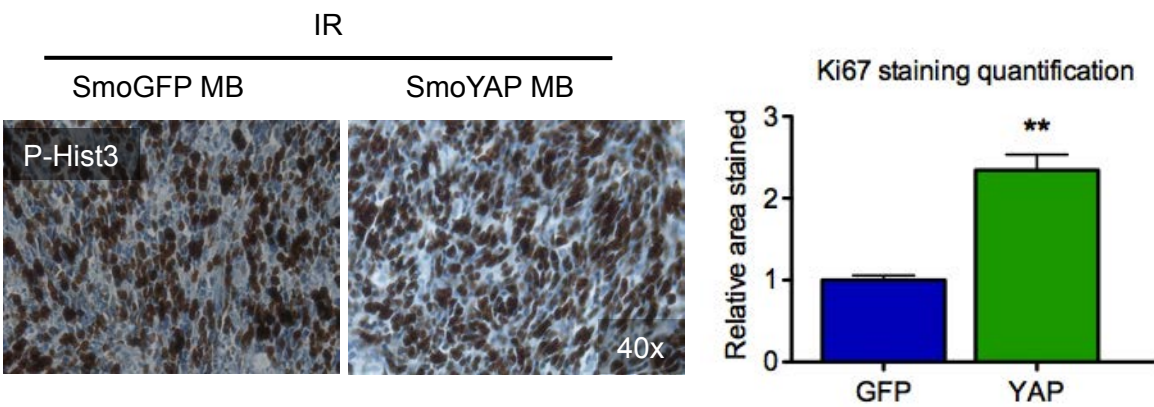

Supplement: NIHMS314384-supplement-2.pdf [file NIHMS314384-supplement-2.pdf]

GFP

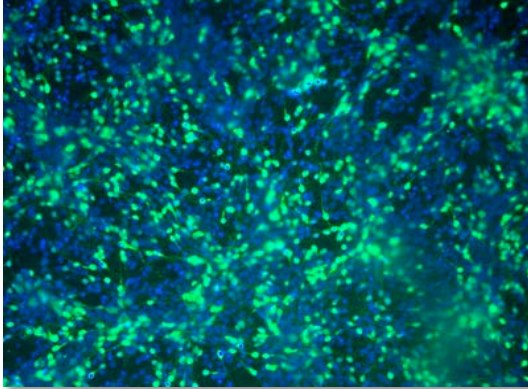

YAP

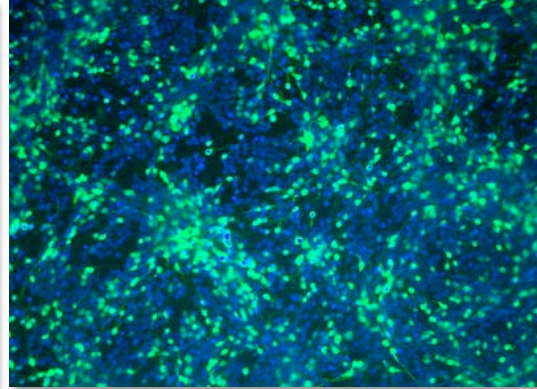

Supplement: NIHMS314384-supplement-3.pdf [file NIHMS314384-supplement-3.pdf]

A

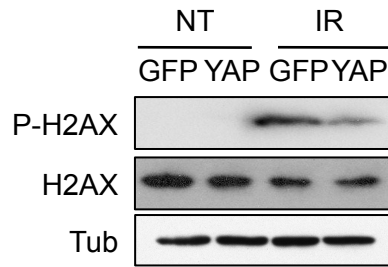

B

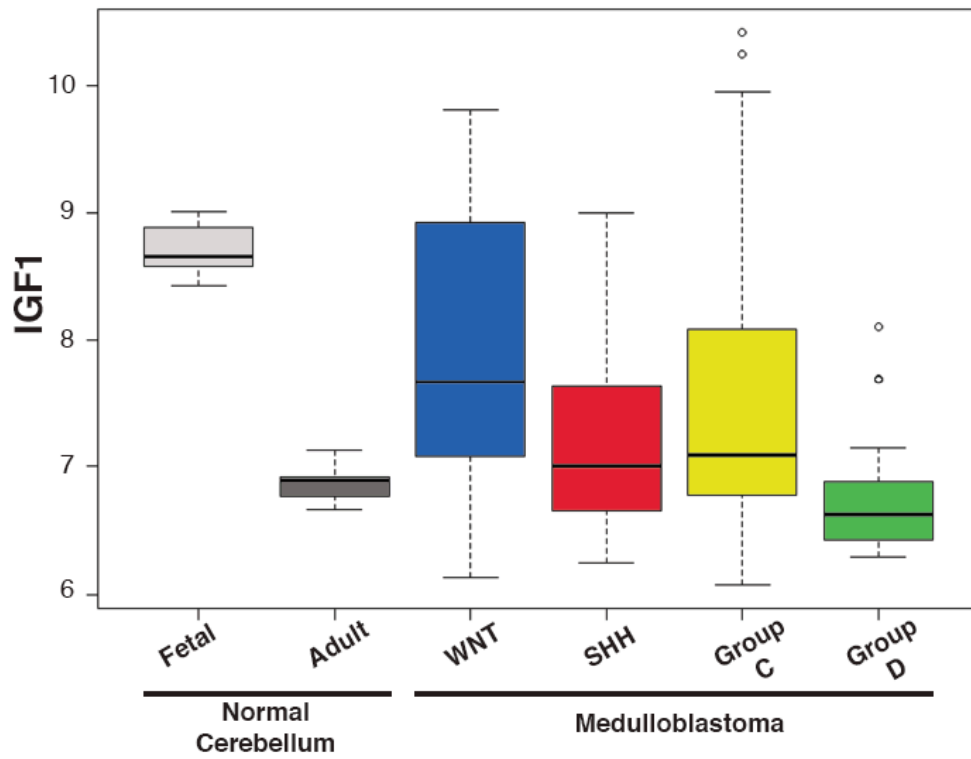

Supplement: NIHMS314384-supplement-5.pdf [file NIHMS314384-supplement-5.pdf]
